# Supplementary material
Source: publisher site journal article supplement (https://www.dovepress.com/article/432062)
Supplement: Supplementary file 1 [file get_supplementary_file.php]

Supplementary Table 1 TKIs and anti-PD-1 antibodies combination used in the study

| Drugs | Patients  (n = 67) |
| --- | --- |
| lenvatinib + tislelizumab | 13 (19.4) |
| lenvatinib + sintilimab | 14 (20.9) |
| lenvatinib + camrelizumab | 5 (7.5) |
| donafenib + tislelizumab | 7 (10.4) |
| donafenib + sintilimab | 8 (11.9) |
| donafenib + camrelizumab | 6 (9.0) |
| apatinib + tislelizumab | 2 (3.0) |
| apatinib + sintilimab | 1 (1.5) |
| apatinib + camrelizumab | 11 (16.4) |

TKIs, tyrosine kinase inhibitor

Supplementary Table 2 Treatment-related Adverse Events

|  | Any grade | Grade 3/4 |  |
| --- | --- | --- | --- |
| Neutropenia | 17 (25.4) | 3 (4.5) |  |
| Thrombocytopenia | 19 (28.4) | 2 (3.0) |  |
| Fatigue | 28 (41.8) | 1 (1.5) |  |
| Hypertension | 9 (13.4) | 2 (3.0) |  |
| Weight loss | 8 (11.9) | 1 (1.5) |  |
| Hand foot skin reaction | 15 (22.4) | 2 (3.0) |  |
| Rash | 12 (17.9) | 1 (1.5) |  |
| Nausea | 23 (34.3) | 4 (6.0) |  |
| Vomiting | 14 (20.9) | 2 (3.0) |  |
| Diarrhea | 12 (17.9) | 2 (3.0) |  |
| Abdominal pain | 17 (25.4) | 3 (4.5) |  |
| Sensory neuropathy | 9 (13.4) | 1 (1.5) |  |
| Proteinuria | 13 (19.4) | 1 (1.5) |  |
| Elevated ALT | 24 (35.8) | 5 (7.5) |  |
| Elevated AST | 23 (34.3) | 10 (14.9) |  |
| Hyperbilirubinemia | 20 (29.9) | 1 (1.5) |  |
| Hypoalbuminemia | 23 (34.3) | 2 (3.0) |  |
| Fever | 12 (17.9) | 1 (1.5) |  |
| Anemia | 14 (20.9) | 1 (1.5) |  |
| Elevated creatinine | 2 (3.0) | 1 (1.5) |  |

Supplementary Table 3 Comparison of clinicopathological characteristics between pCR and non-pCR

| Characteristics | pCR  (n = 23) | non-pCR  (n = 44) | *P* value |
| --- | --- | --- | --- |
| Sex |  |  | 0.957 |
| Male | 21 (91.3) | 40 (90.9) |  |
| Female | 2 (8.7) | 4 (9.1) |  |
| Age, years |  |  |  |
| Median (range) | 52 (36-74) | 52 (26-68) | 0.905 |
| ≤ 50 | 8 (34.8) | 20 (45.5) | 0.400 |
| > 50 | 15 (65.2) | 24 (54.5) |  |
| Median HAIC sessions (range) | 3 (2-5) | 3 (2-6) | 0.750 |
| ECOG performance status |  |  | 0.994 |
| 0 | 12 (52.2) | 23 (52.3) |  |
| 1 | 11 (47.8) | 21 (47.7) |  |
| HBV |  |  | 0.133 |
| Positive | 20 (87.0) | 31 (70.5) |  |
| Negative | 3 (13.0) | 13 (29.5) |  |
| HCV |  |  | 0.466 |
| Positive | 0 (0) | 1 (2.3) |  |
| Negative | 23 (100) | 43 (97.7) |  |
| Child-Pugh |  |  | 0.988 |
| 5 | 20 (87.0) | 38 (86.4) |  |
| 6 | 2 (8.7) | 4 (9.1) |  |
| 7 | 1 (4.3) | 2 (4.5) |  |
| ALBI grade |  |  | 0.806 |
| Grade 1 | 15 (65.2) | 30 (68.2) |  |
| Grade 2 | 8 (34.8) | 14 (31.8) |  |
| Tumor number |  |  | < 0.001 |
| Single | 16 (69.6) | 9 (20.5) |  |
| Multiple | 7 (30.4) | 35 (79.5) |  |
| Tumor distribution |  |  | 0.038 |
| Unilobar | 18 (78.3) | 23 (52.3) |  |
| Bilobar | 5 (21.7) | 21 (47.7) |  |
| PVTT |  |  |  |
| Present | 15 (65.2) | 17 (38.6) | 0.039 |
| Absent | 8 (34.8) | 27 (61.4) |  |
| Vp0 | 8 (34.8) | 26 (59.1) | 0.309 |
| Vp2 | 2 (8.7) | 2 (4.5) |  |
| Vp3 | 8 (34.8) | 10 (22.7) |  |
| Vp4 | 5 (21.7) | 6 (13.6) |  |
| Baseline tumor size, cm |  |  |  |
| Median (range) | 9.5 (4.9-20.3) | 11.6 (3.8-23.0) | 0.256 |
| ≤ 10 | 3 (13.0) | 7 (15.9) | 0.755 |
| > 10 | 20 (87.0) | 37 (84.1) |  |
| Baseline AFP, ng/mL |  |  | 0.750 |
| ≤ 400 | 14 (60.9) | 25 (56.8) |  |
| > 400 | 9 (39.1) | 19 (43.2) |  |

pCR, pathological complete response; HAIC, hepatic arterial infusion chemotherapy; ECOG, Eastern Cooperative Oncology Group; HBV, hepatitis B virus; HCV, hepatitis C virus; PVTT, portal vein tumor thrombus; AFP, ⍺-fetoprotein

Supplementary Table 4 Univariate and multivariate analyses of variables associated with pCR

|  | univariate |  | multivariate |  |
| --- | --- | --- | --- | --- |
|  | *P* value |  | *P* value | HR (95% CI) |
| Sex (Male/Female) | 0.957 |  |  |  |
| Age (≤ 50/> 50) | 0.402 |  |  |  |
| ECOG performance status (0/1) | 0.994 |  |  |  |
| HBV (Positive/Negative) | 0.143 |  |  |  |
| Child-Pugh (5/6/7) | 0.998 |  |  |  |
| ALBI grade (Grade 1/Grade 2) | 0.806 |  |  |  |
| Tumor number (Single/Multiple) | <0.001 |  | 0.002 | 0.146 (0.044-0.490) |
| Tumor distribution (Unilobar/Bilobar) | 0.043 |  | NS |  |
| PVTT (Present/Absent) | 0.043 |  | NS |  |
| Baseline tumor size (≤ 10/> 10) | 0.047 |  | NS |  |
| Baseline AFP (≤ 400/> 400) | 0.750 |  |  |  |

ECOG, Eastern Cooperative Oncology Group; HBV, hepatitis B virus; PVTT, portal vein tumor thrombus; AFP, ⍺-fetoprotein; NS, not significant
